# Supplementary figures and images for: Prader-Willi syndrome protein necdin regulates the nucleocytoplasmic distribution and dopaminergic neuron development
Source: PubMed Central journal article supplement — Sci Rep. 2024 Dec 30;14:31605. doi: 10.1038/s41598-024-76981-y (PMC11686063; doi:10.1038/s41598-024-76981-y), 2024-12-30

Figure 1b

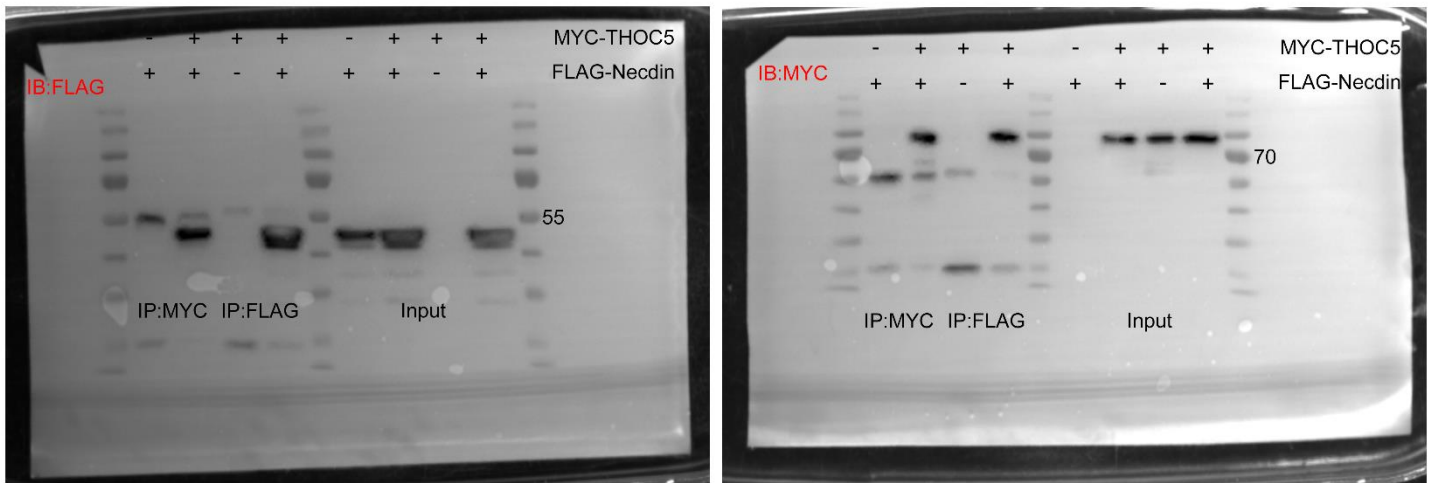

Figure 1c

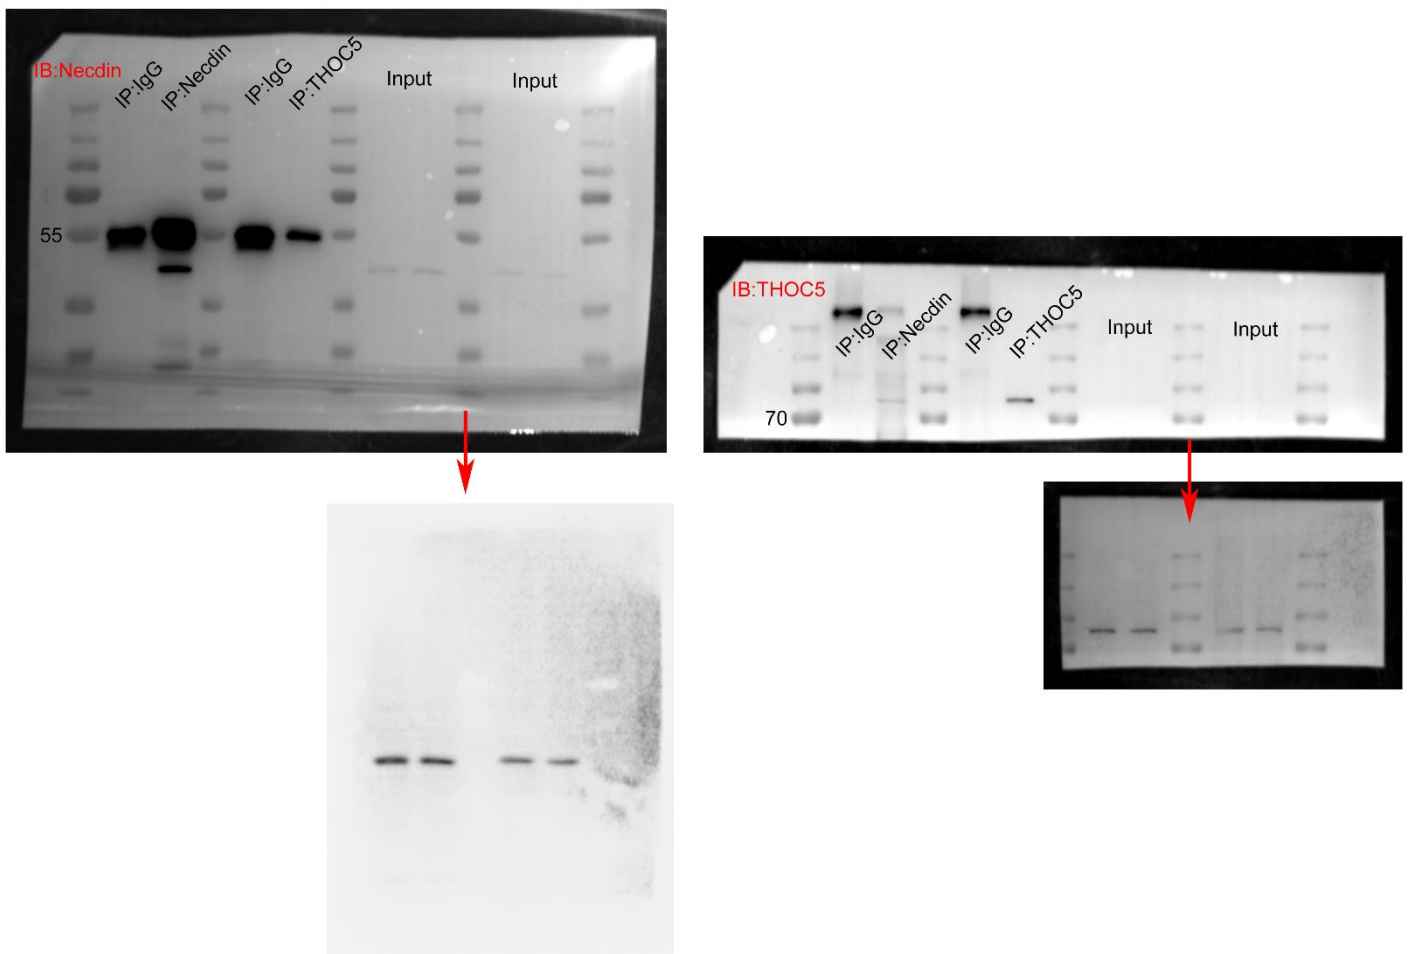

Figure 2a

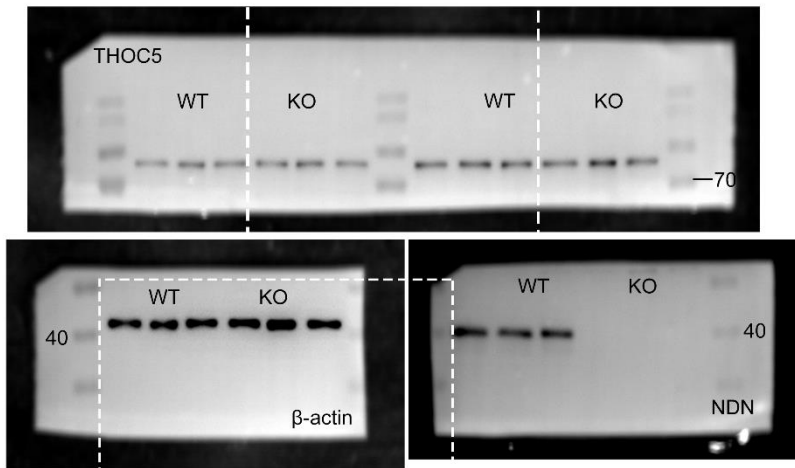

Figure 2c

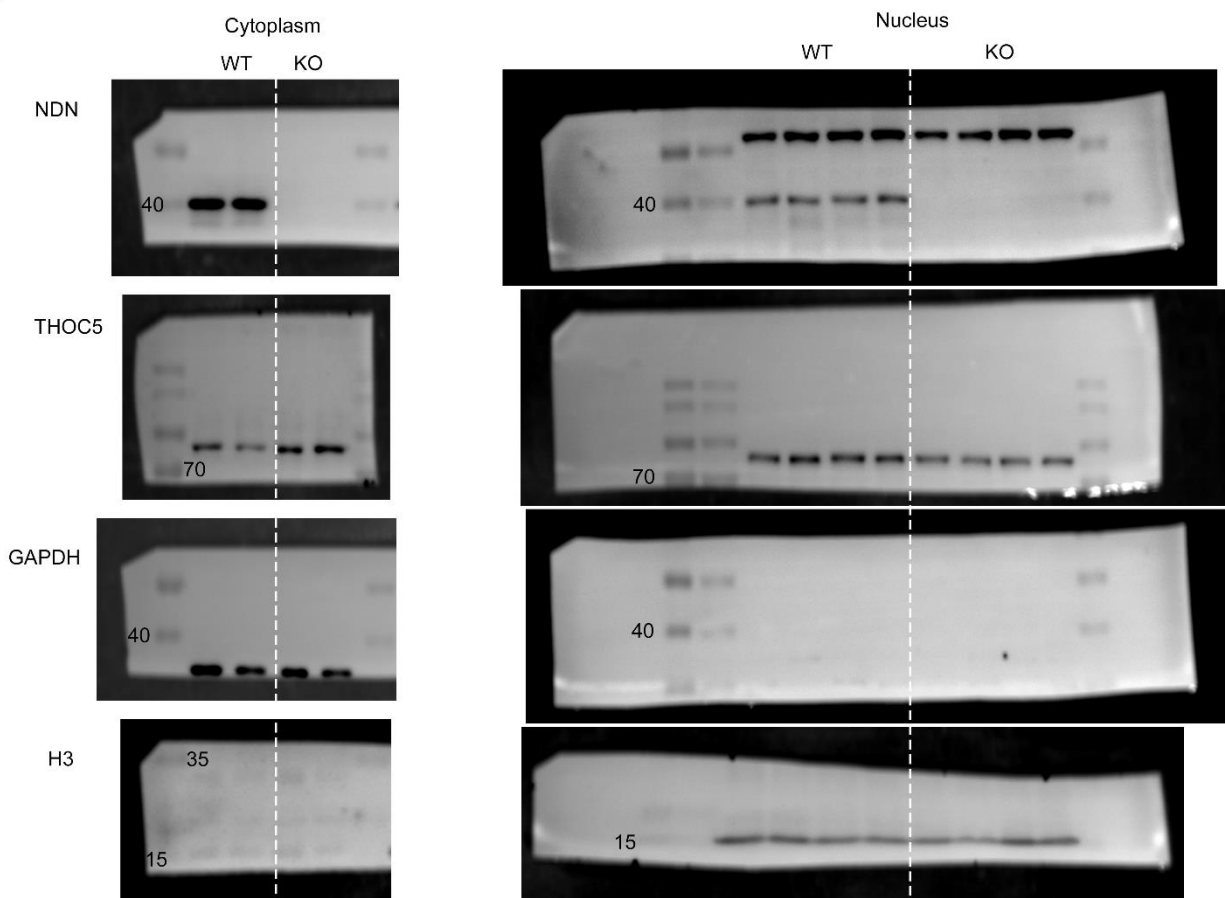

S1a

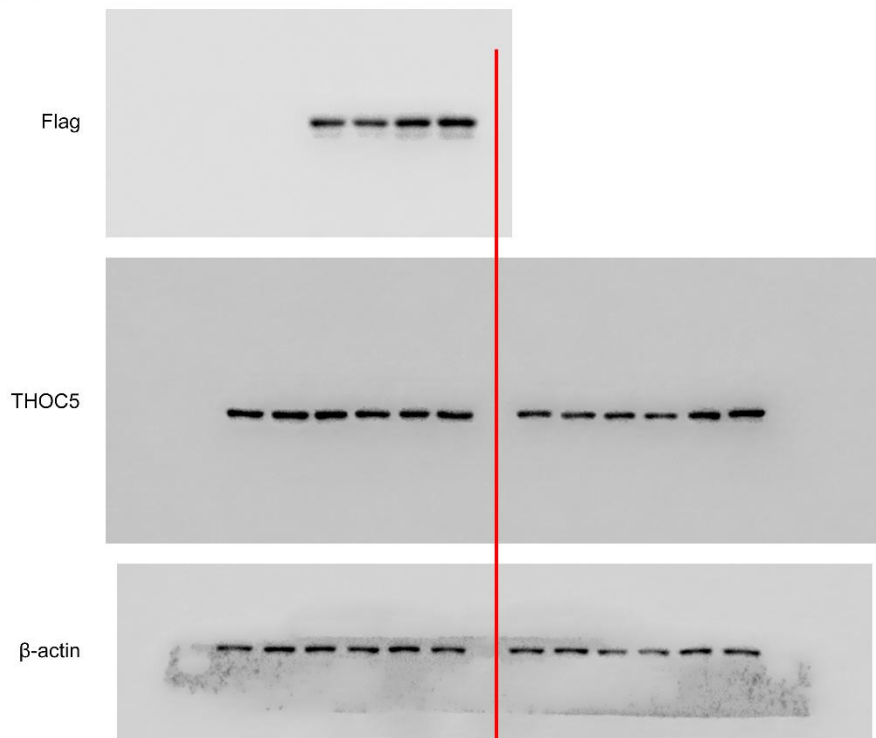

S1c

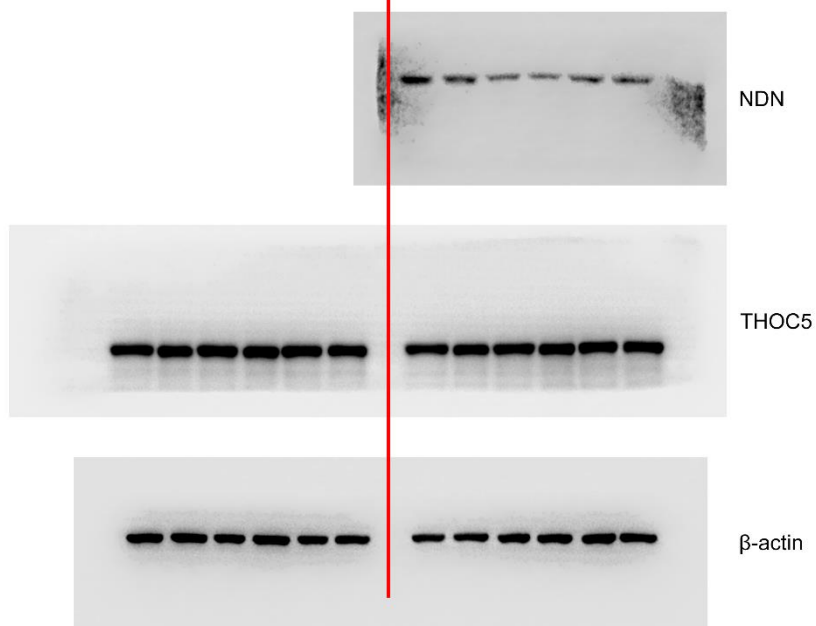

Supplement: 41598_2024_76981_MOESM2_ESM.pdf [file 41598_2024_76981_MOESM2_ESM.pdf]
